# Supplementary material for: Overexpression of the transcription factor NF-YC9 confers abscisic acid hypersensitivity in Arabidopsis
Source: PubMed Central journal article supplement (PMC5688200; doi:10.1007/s11103-017-0661-1), 2017-09-18
Supplement: 11103_2017_661_MOESM1_ESM.pdf [file 11103_2017_661_MOESM1_ESM.pdf]

# Supplemental Data

Bi C et al. Overexpression of the transcription factor NF-YC9 confers abscisic acid hypersensitivity in *Arabidopsis*

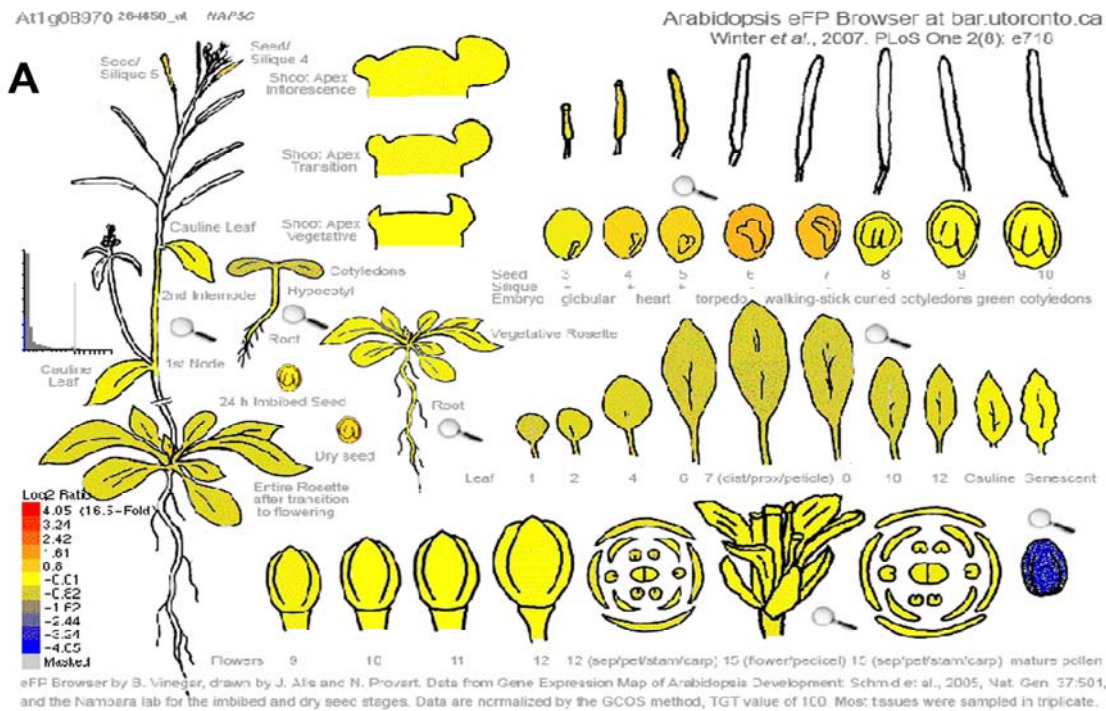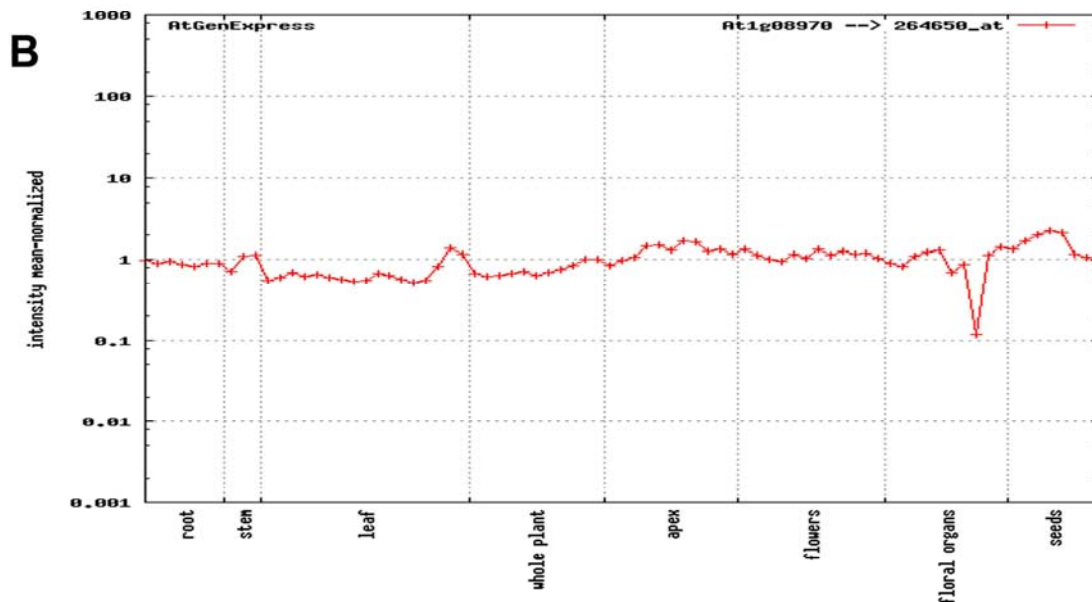

**Supplemental Fig. S1** Expression of *NF-YC9* in various tissues/organs

(A) Expression of *NF-YC9* in various tissues/organs published at Arabidopsis eFP Browser

([http://bar.utoronto.ca/efp/cgi-bin/efpWeb.cgi?dataSource=Developmental\\_Map](http://bar.utoronto.ca/efp/cgi-bin/efpWeb.cgi?dataSource=Developmental_Map)).

(B) Expression of *NF-YC9* in various tissues/organs published at AtGenExpress (<http://jsp.weigelworld.org/expviz/expviz.jsp>).



**Supplemental Table S7.** Primers for BiFC assays

---

|             |                 |                                          |
|-------------|-----------------|------------------------------------------|
| NF-YC9-cYFP | Forward primer: | 5'- GCTCTAGAATGGATCAACAAGACCATGG -3'     |
|             | Reverse primer: | 5'- ACGCGTCGAC ATTTTCCTGGTCAGGTTGGT -3'  |
| ABI5-nYFP   | Forward primer: | 5'- TTGGCGCGCC ATGGTAACTAGAGAAACGAA -3'  |
|             | Reverse primer: | 5'- ACGCGTCGAC GAGTGGACAACCTCGGGTTCC -3' |

---

**Supplemental Table S8.** Primers for subcellular localization of NF-YC9 protein

---

|            |                 |                                          |
|------------|-----------------|------------------------------------------|
| NF-YC9-GFP | Forward primer: | 5'- CCGGAATTCATGGATCAACAAGACCATGG -3'    |
|            | Reverse primer: | 5'- ACGCGTCGACGGATTTTCCTGGTCAGGTTGGT -3' |
| PYR1-RFP   | Forward primer: | 5'- CCTTAATTAATGCCTTCGGAGTTAACACC -3'    |
|            | Reverse primer: | 5'- AGGCGCGCCACGTCACCTGAGAACCACTTC -3'   |

---

**Supplemental Table S9.** Primers for assaying the *ABI5*, *EM1*, *EM6* and *RD29B* expression levels in wild-type Col-0, *nf-yc9-1* mutant and NF-YC9 overexpression lines by RT-PCR. LP, left primer; RP, right primer

---

|              |     |                                   |
|--------------|-----|-----------------------------------|
| <i>ABI5</i>  | LP: | 5'- CAATAAGAGAGGGATAGCGAACGAG -3' |
|              | RP: | 5'- CGTCCATTGCTGTCTCCTCCA -3'     |
| <i>EM1</i>   | LP: | 5'- CAAAGCAACTGAGCAGAGAAGAGC -3'  |
|              | RP: | 5'- CCTCCCTTGCTCCTTCCTCA -3'      |
| <i>EM6</i>   | LP: | 5'- CAGCAGATGGGACGCAAAGG -3'      |
|              | RP: | 5'- TATTACATCCGTGTGGGGAAGTTTG -3' |
| <i>RD29B</i> | LP: | 5'- CTTGGCACCAACCGTTGGGACTA -3'   |
|              | RP: | 5'- TCAGTTCCAGAATCTTGAAC -3'      |

---
